# Supplementary material for: C23 promotes tumorigenesis via suppressing p53 activity
Source: PubMed Central journal article supplement (PMC5295430; doi:10.18632/oncotarget.11071), 2016-08-05
Supplement: oncotarget-07-58274-s001.pdf [file oncotarget-07-58274-s001.pdf]

## C23 promotes tumorigenesis via suppressing p53 activity

### SUPPLEMENTARY FIGURES

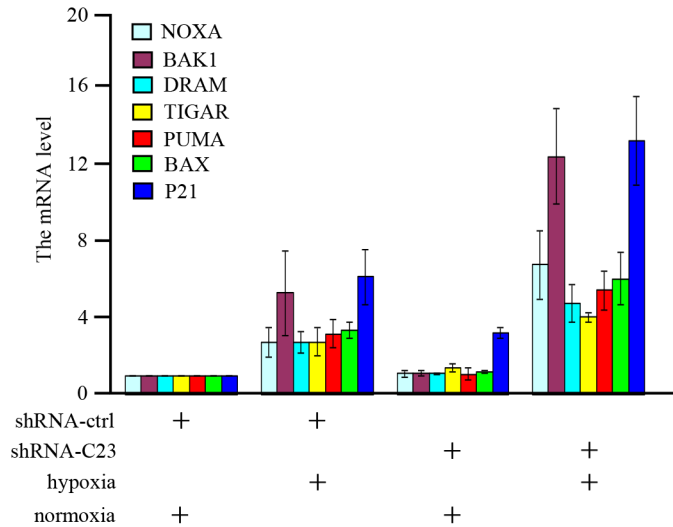

**Supplementary Figure S1:** HCT116 cells with and without stable knockdown of C23 were cultured under normoxic (20% O<sub>2</sub>) or hypoxic (1% O<sub>2</sub>) condition for 24 hours, the p53 target gene mRNA expression levels were then analyzed by qRT-PCR analysis.

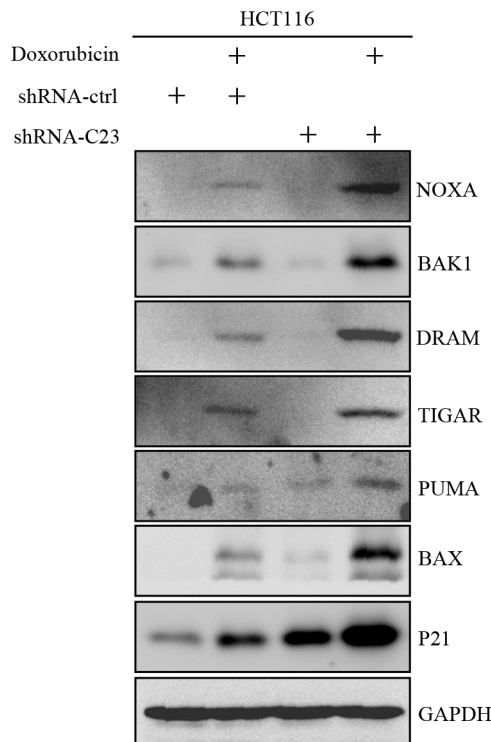

**Supplementary Figure S2:** HCT116 cells with and without stable knockdown of C23 were under Doxorubicin (100ng/ml) treatment for 24 hours, then the protein level of p53 target genes were analyzed by western blot analysis.

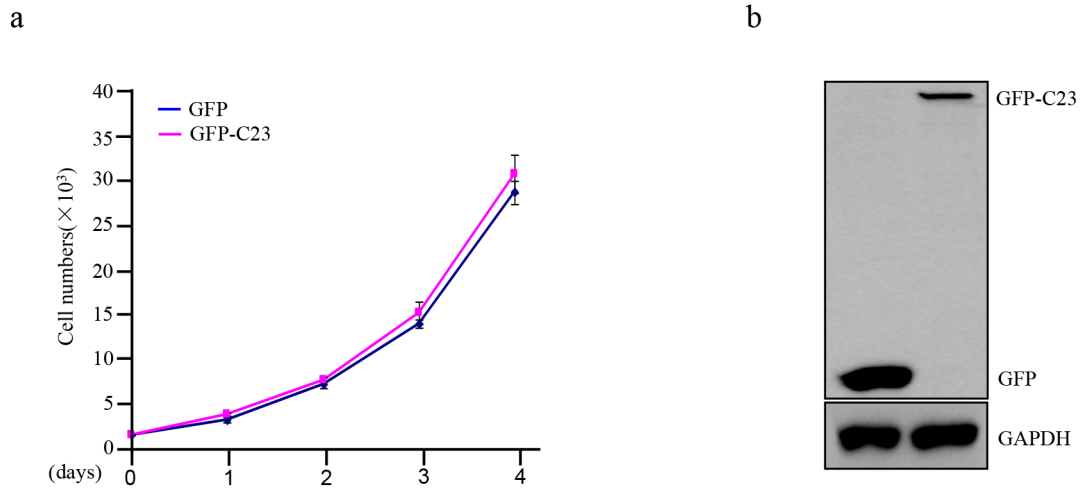

**Supplementary Figure S3: a.** The number of H1299 cells with GFP or GFP-C23 transfection were analyzed by cell counter. The data were represented as mean $\pm$ S.D. of three independent experiments. **b.** The expression of GFP and GFP-C23 in H1299 cells were analyzed with anti-GFP antibody.

a

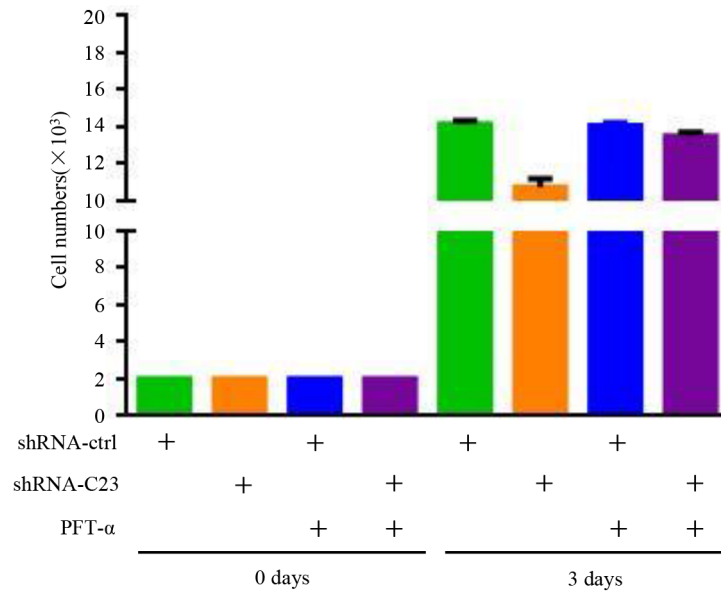

b

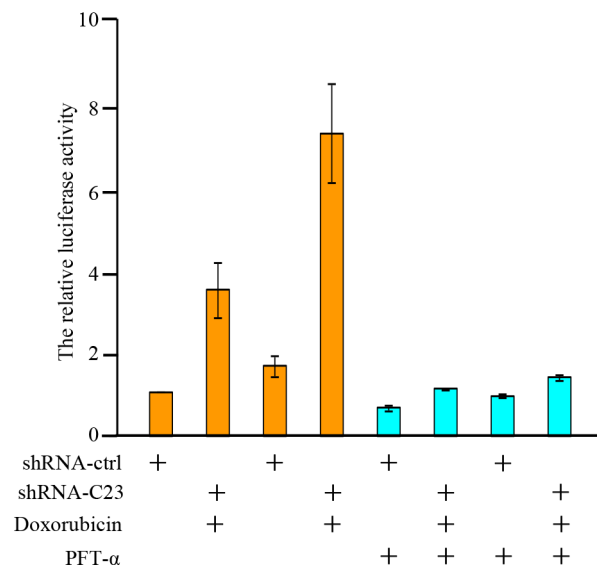

**Supplementary Figure S4: a.** HCT116 cells with and without stable knockdown of C23 were treated with 20uM pifithrin-alpha for 3 days. The cell numbers were analyzed by cell counter. The data were represented as mean±S.D. of three independent experiments. **b.** HCT116 cells with and without C23 shRNA were co-transfected with pGL3-3×p53-BS-LUC and Renilla. 24 hours after transfection, cells were treated with Doxorubicin (100ng/ml) or combined with pifithrin-alpha (20uM) for 24 hours. The cell lysates were then analyzed by luciferase assay.
